# Supplementary material for: Storage mechanism of K in hydrogen-substituted graphdiyne as a superior anode
Source: Royal Society of Chemistry journal article supplement (doi:10.1039/d1ta01073e), 2021-01-01
Supplement: d1ta01073e1.pdf [file d1ta01073e1.pdf]

## Supporting Information

# Storage Mechanism of K in Hydrogen Substituted Graphdiyne as Superior Anode

Yue Ma<sup>a</sup>, Xiaofeng Fan<sup>a,\*</sup>, David J. Singh<sup>c,d</sup> and W.T. Zheng<sup>a,b</sup>

a. Key Laboratory of Automobile Materials (Jilin University), Ministry of Education,  
and College of Materials Science and Engineering, Jilin University, Changchun,  
130012, China

b. State Key Laboratory of Automotive Simulation and Control, Jilin University,  
Changchun 130012, China

c. Department of Physics and Astronomy, University of Missouri, Columbia,  
Missouri 65211-7010, USA

d. Department of Chemistry, University of Missouri, Columbia, Missouri 65211, USA

\*, Correspondence and requests for materials should be addressed,

Email: xffan@jlu.edu.cn (X. Fan)

Tel: +86-159-4301-3494

**Figure S1**

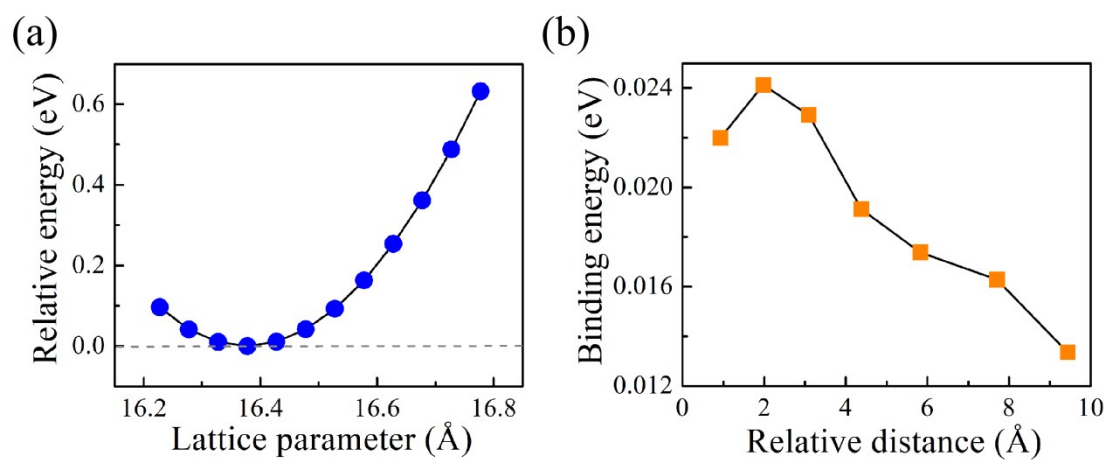

Fig. S1. (a) The relative energy of single-layer HsGDY varies with different lattice constants, and (b) the interlaminar binding energy per atom as a function of the relative distance between two layers in AB stacking HsGDY

Figure S2

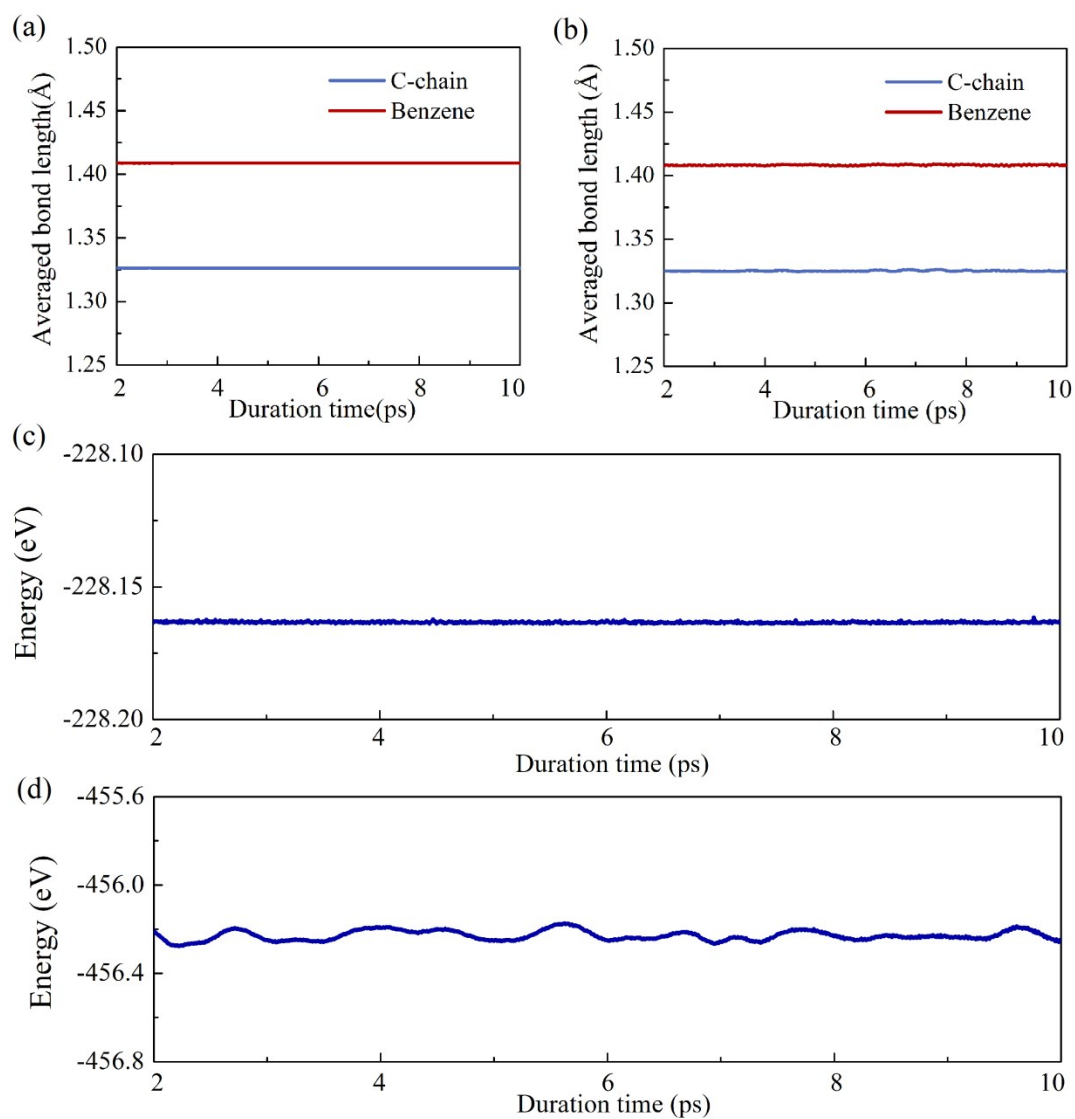

Fig. S2. The averaged carbon bond lengths in C-chains and benzene rings as functions of MD duration time of 8 ps for (a) single-layer and (b) bulk HsGDY, and energies of (c) single-layer and (d) bulk HsGDY as functions of MD duration time at 400k.

**Figure S3**

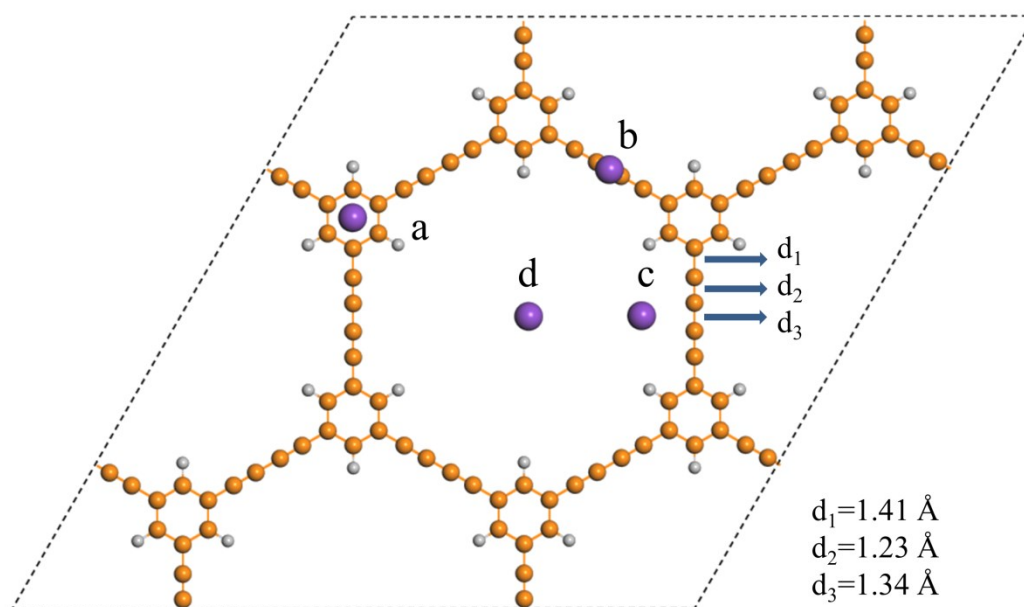

Fig. S3. The top view of the structure of single-layer HsGDY and four potential adsorption sites of K-adsorbed single-layer HsGDY (**d2 corresponds to an acetylene bond**)

Table S1. The  $z$ -axis distance of K relative to the carbon layer, and corresponding adsorption energy in single-layer HsGDY for different adsorption sites (in Fig. S3)

| Site                                      | a    | b    | c    | d    |
|-------------------------------------------|------|------|------|------|
| <b>Distance (<math>\text{\AA}</math>)</b> | 2.63 | 2.48 | 0    | 0    |
| <b>Adsorption energy (eV)</b>             | 1.04 | 0.99 | 0.77 | 0.12 |

Figure S4

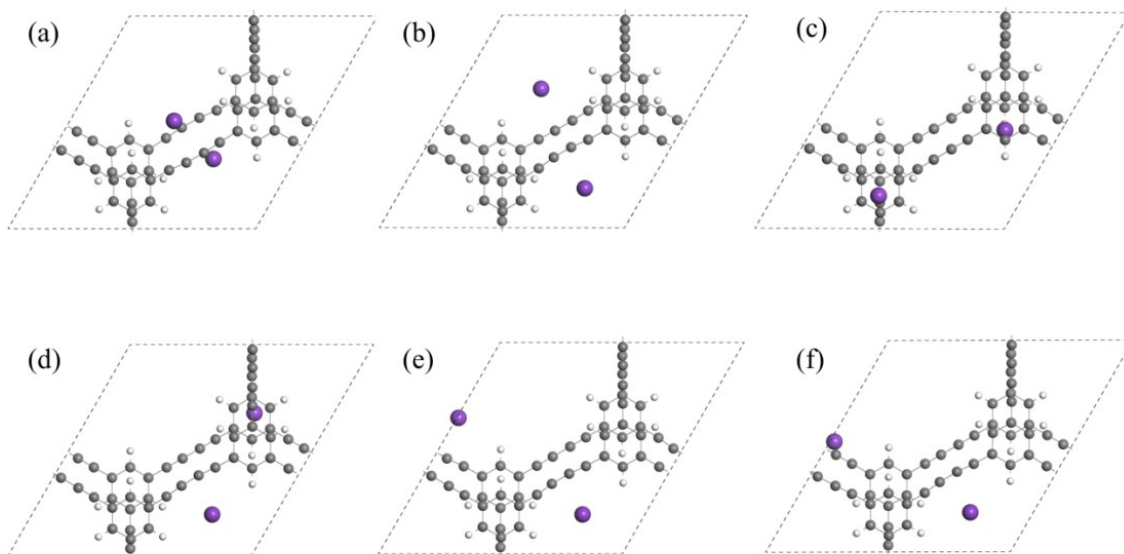

Fig. S4. The top view of various potential low-energy atomic structure models (a-f) with the K/C ratio of 0.042 in bulk HsGDY. The corresponding binding energies are (a)1.64eV, (b)0.80eV, (c)1.08 eV, (d) 0.70 eV, (e)0.86 eV, and (f) 1.20eV, respectively.

Figure S5

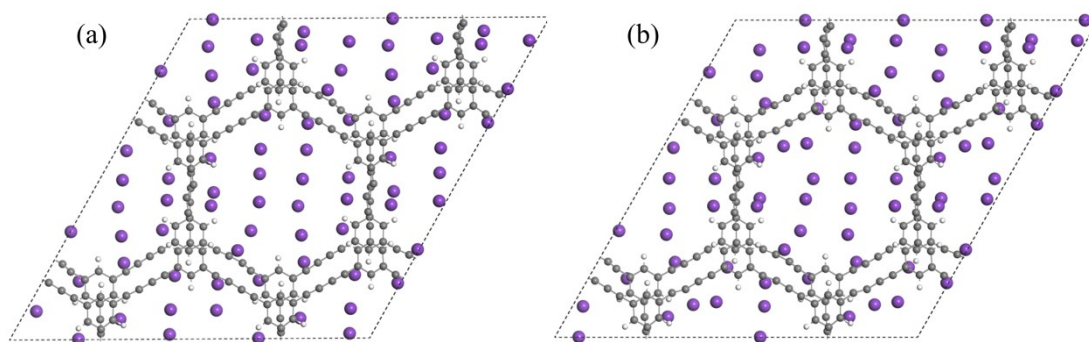

Fig. S5. The top view of two low-energy atomic structure models (a, b) with the K/C ratio of 0.4 in bulk HsGDY. The corresponding binding energies are (a) 1.40eV and (b) 1.42eV, respectively.

**Figure S6**

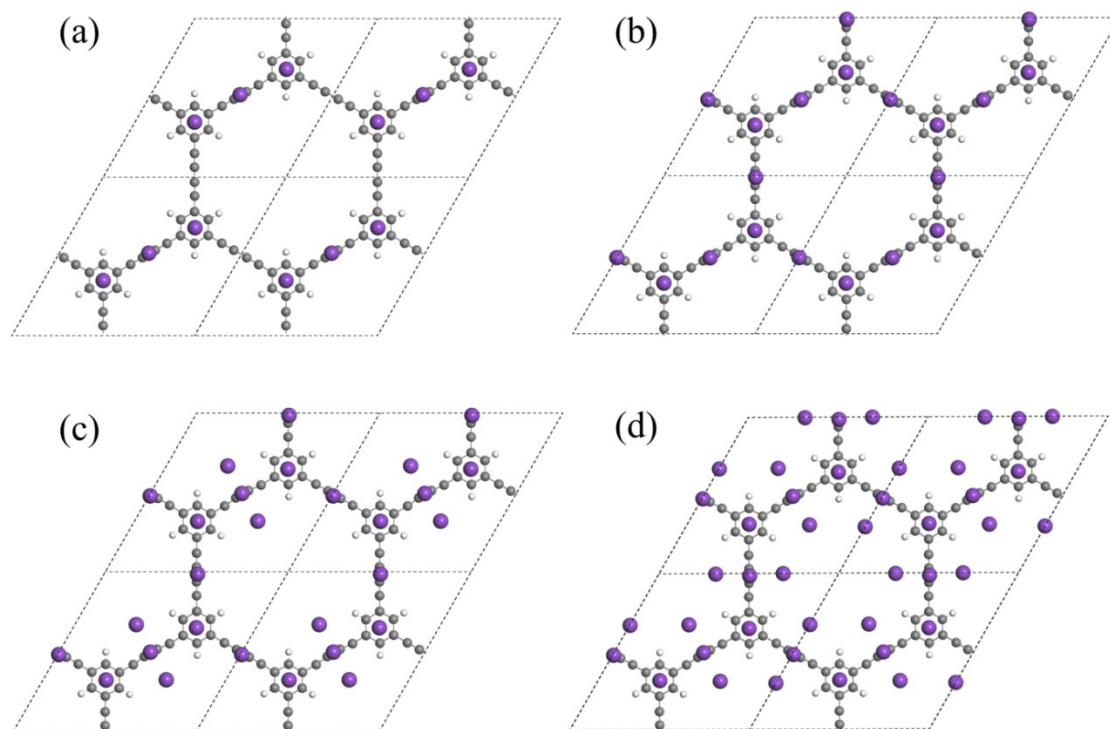

Fig. S6. The top view of stable structures of K-adsorbed single-layer HsGDY with the ratio of K/C of (a) 0.13, (b) 0.21, (c) 0.29 and (d) 0.46

**Figure S7**

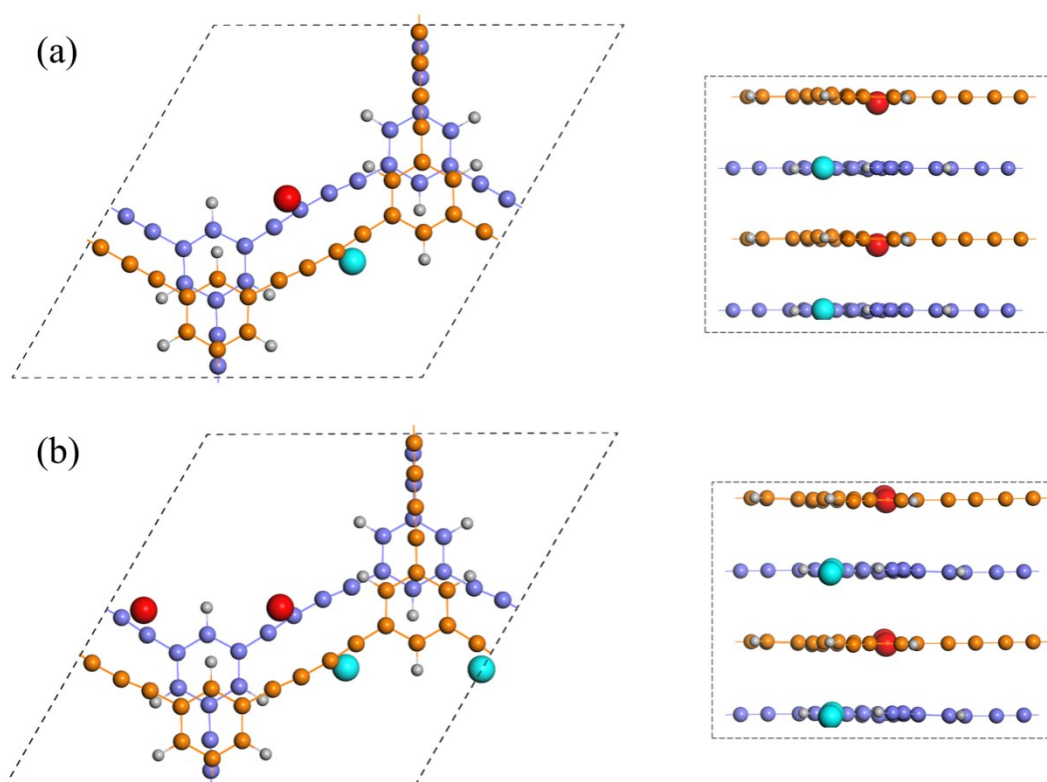

Fig. S7. The top and side view of stable structures of K-adsorbed bulk HsGDY with the ratio of K/C of (a) 0.042 and (b) 0.083. The red and cyan spheres represent K atoms in the orange and purple carbon layers, respectively.

**Figure S8**

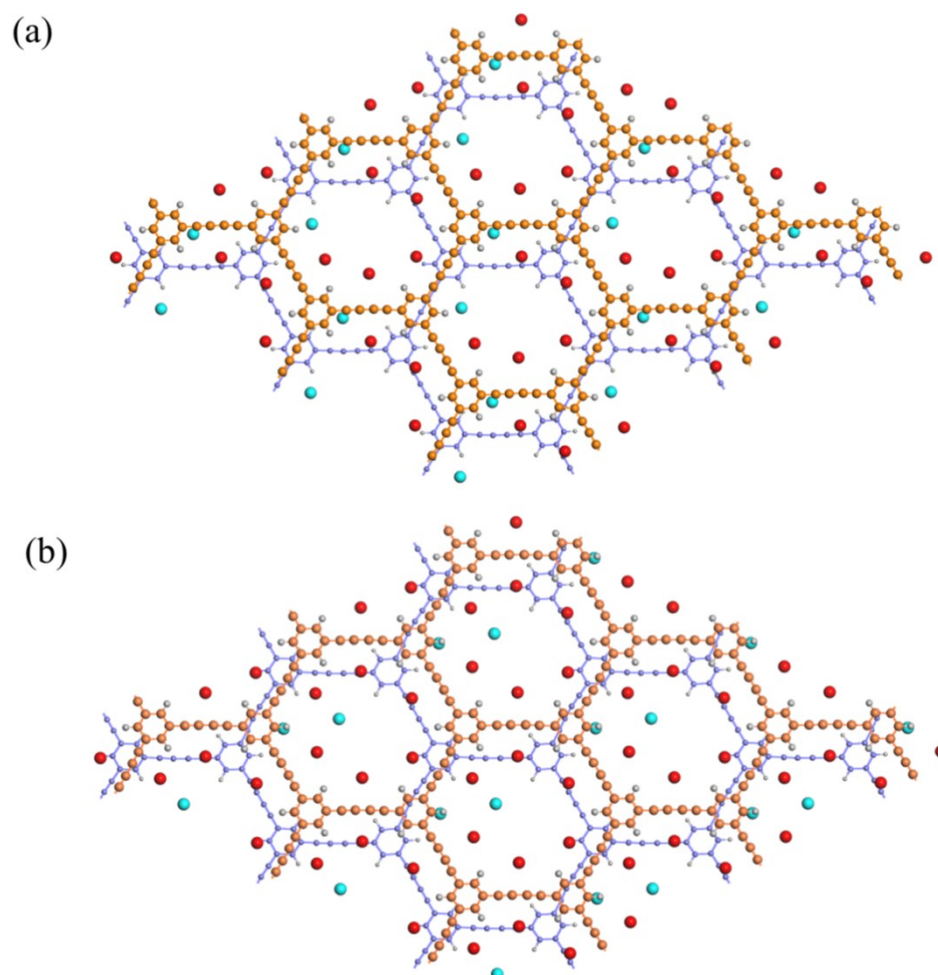

Fig. S8. The side view of stable structures of K-adsorbed bulk HsGDY with the ratio of K/C of (a) 0.15 and (b) 0.17.



Figure S9

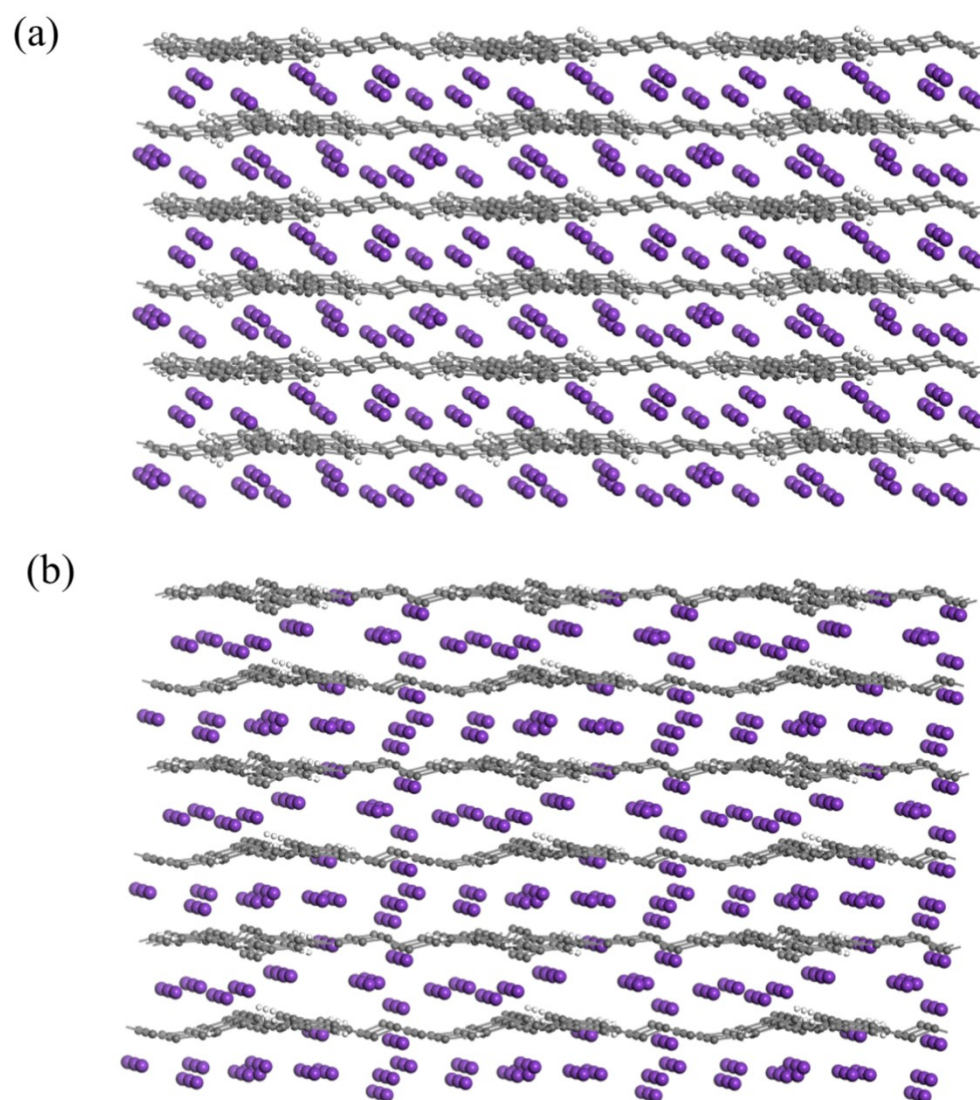

Fig. S9. The side view of stable structures of K-adsorbed bulk HsGDY with the ratio of K/C of (a) 0.4 and (b) 0.48

**Figure S10**

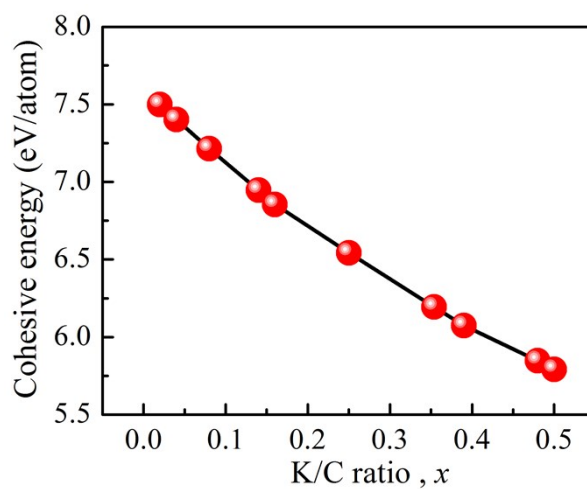

Fig. S10. The cohesive energy bulk HsGDY as a function of the concentration of potassium.

**Figure S11**

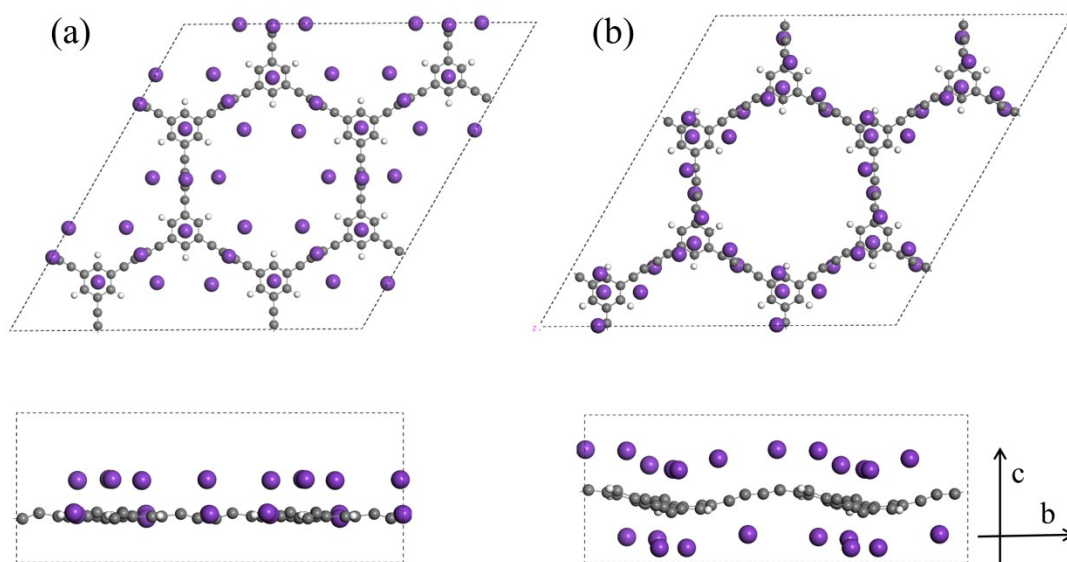

Fig. S11. Top and side views of (a) initiating structure and (b) the structure after 10ps relaxation at 600K with the ratio of K/C of 0.46 in single-layer HsGDY

**Figure S12**

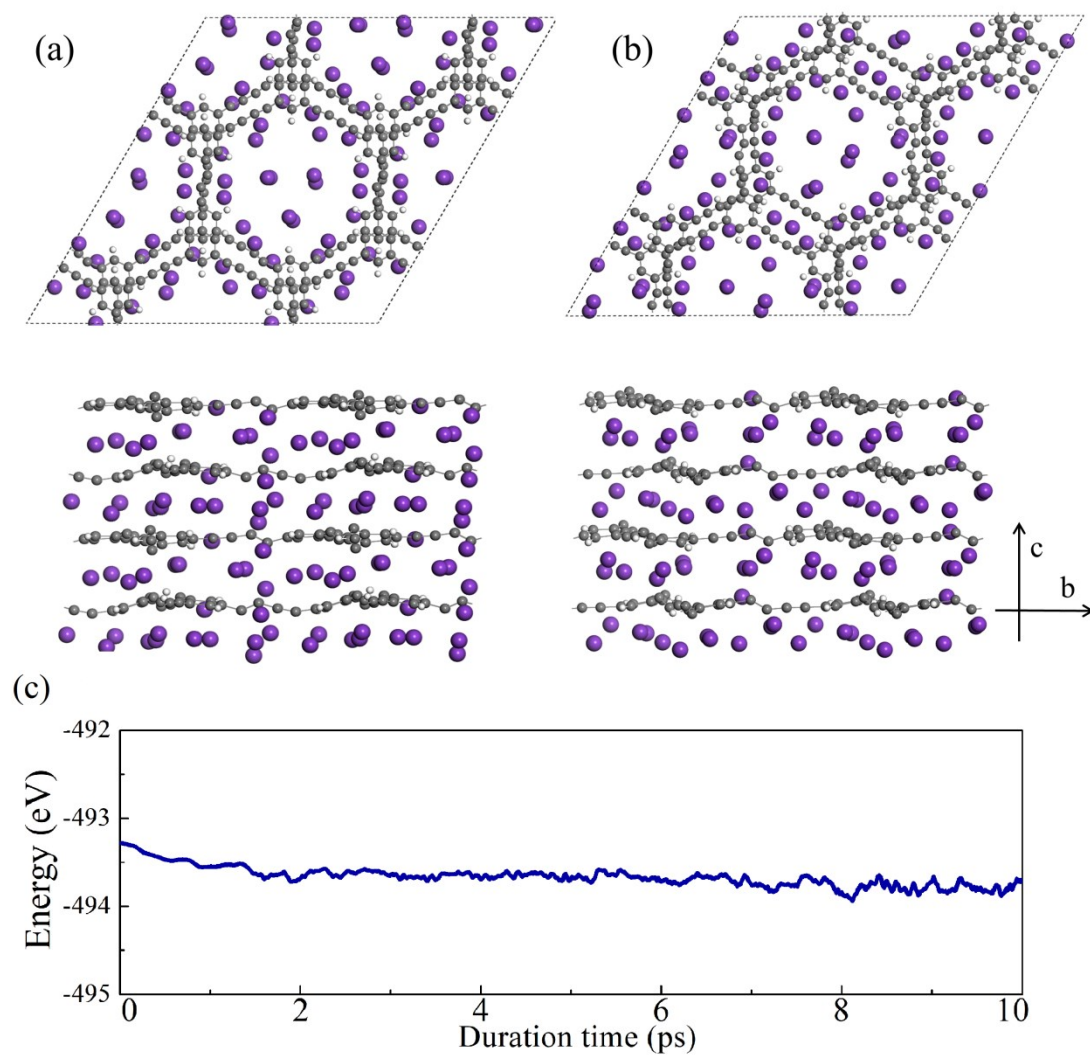

Fig. S12. Top and side views of (a) initiating structure and (b) the structure of after 10ps relaxation at 600K with the ratio of K/C of 0.48 in bulk HsGDY, (c) energy of bulk HsGDY as a function of molecular dynamical duration time at 600 K with the K/C ratio of 0.48

**Figure S13**

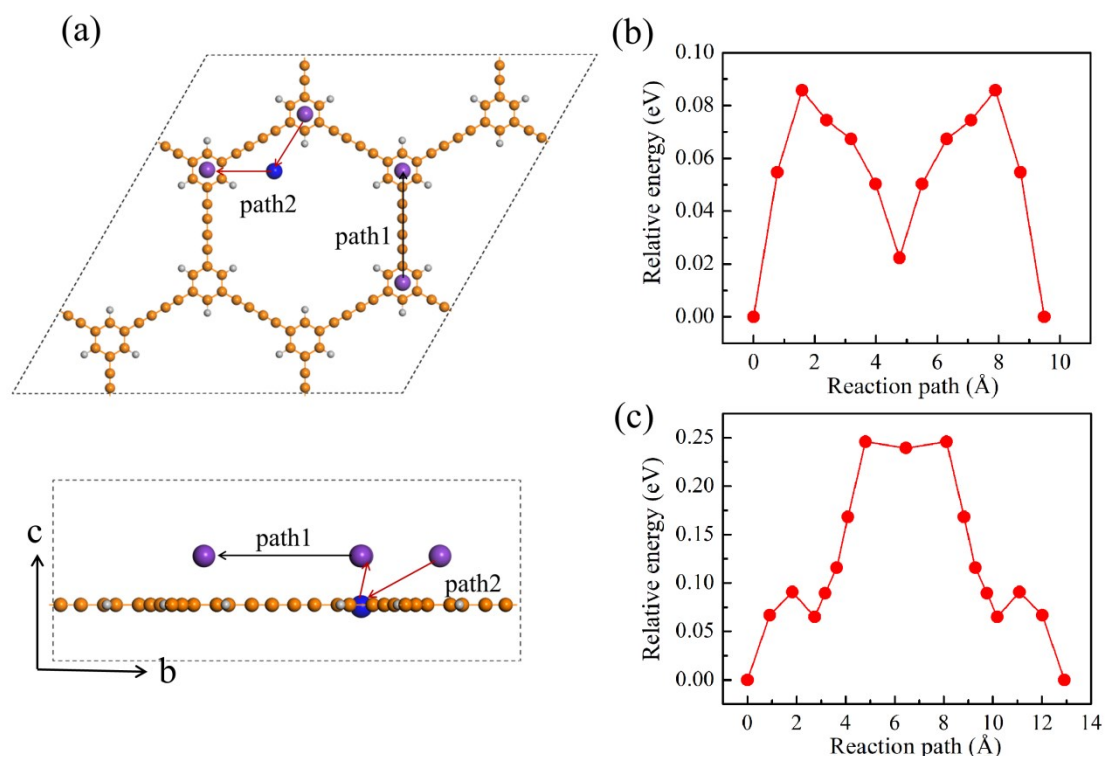

Fig. S13. (a) Schematic diagrams of diffusion in single-layer HsGDY, corresponding potential energy barrier of (b) path-1 and (c) path-2. In (a), the purple balls and blue ball correspond to the site- *a* and *c* (in Fig. S2), respectively

**Figure S14**

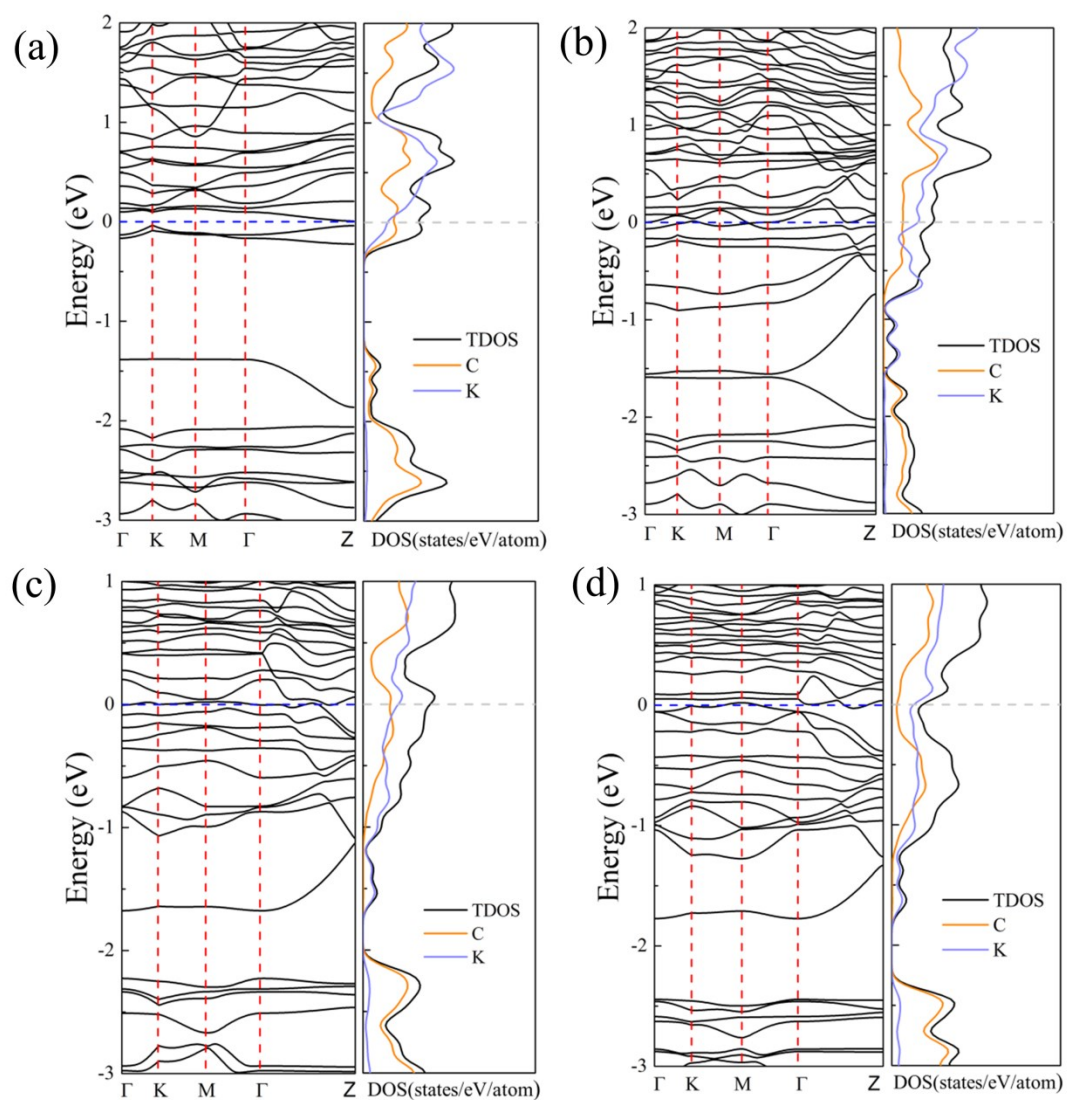

Fig. S14. Band structure and partial density of states of bulk HsGDY with the ratio of K/C of (a) 0.083, (b) 0.25, (c) 0.4 and (d) 0.5



**Figure S15**

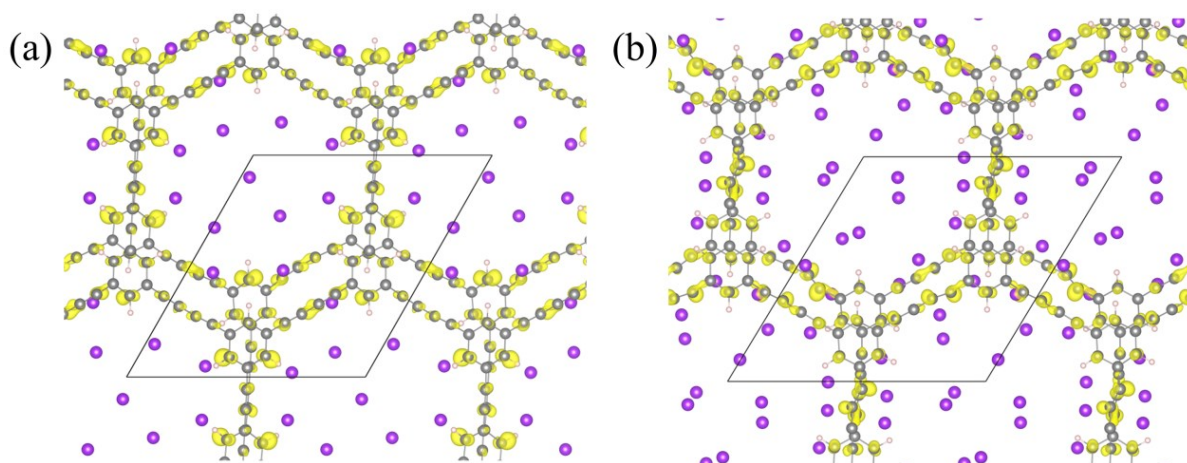

Fig. S15. Distribution of electron charge difference for bulk HsGDY with the ratio of K/C of (a) 0.25 and (b) 0.5

**Figure S16**

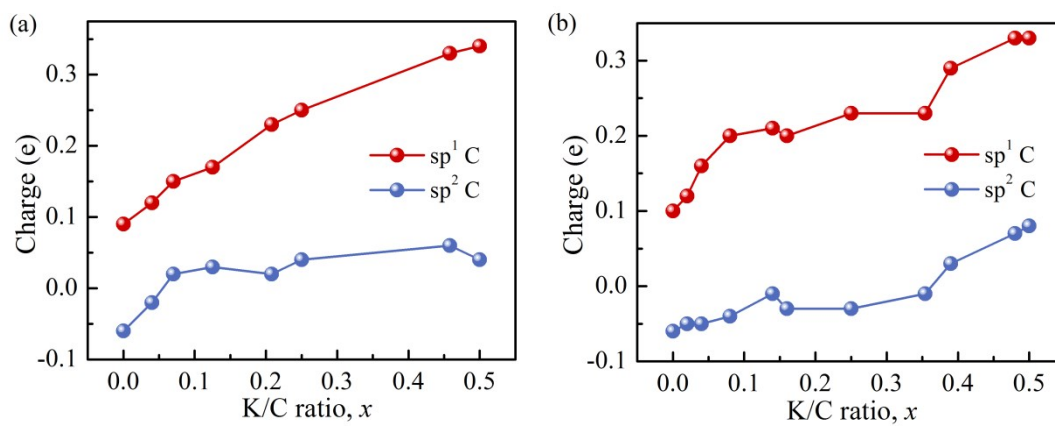

Fig. S16. Bader charge transferred from K to  $sp^1$  and  $sp^2$  carbon in (a) single-layer and (b) bulk HsGDY as functions of K/C ratio.

**Table S2** Structural information of bulk HsGDY is calculated from DFT.

| Space group of bulk HsGDY : CMMC |          |          |          |
|----------------------------------|----------|----------|----------|
| Structural parameters            |          |          |          |
| a=16.37 Å                        |          | α=90°    |          |
| b=16.37 Å                        |          | β=90°    |          |
| c=6.85 Å                         |          | γ=60°    |          |
| Atoms' coordinates               |          |          |          |
| Atom                             | a/x      | b/y      | c/z      |
| C1                               | 0.774348 | 0.600272 | 0.403447 |
| C2                               | 0.440883 | 0.267253 | 0.403433 |
| C3                               | 0.874002 | 0.550437 | 0.403727 |
| C4                               | 0.960537 | 0.506863 | 0.403976 |
| C5                               | 0.62521  | 0.600328 | 0.403483 |
| C6                               | 0.292094 | 0.267266 | 0.403497 |
| C7                               | 0.575436 | 0.550493 | 0.403782 |
| C8                               | 0.532522 | 0.506898 | 0.404025 |
| C9                               | 0.724493 | 0.550821 | 0.403352 |
| C10                              | 0.391539 | 0.217184 | 0.403208 |
| C11                              | 0.441385 | 0.117498 | 0.403042 |
| C12                              | 0.484592 | 0.030949 | 0.403118 |
| C13                              | 0.62491  | 0.749807 | 0.403468 |
| C14                              | 0.292155 | 0.415838 | 0.403949 |
| C15                              | 0.575084 | 0.849393 | 0.403438 |
| C16                              | 0.531909 | 0.935892 | 0.403383 |
| C17                              | 0.575772 | 0.699681 | 0.403578 |
| C18                              | 0.241899 | 0.366649 | 0.403818 |
| C19                              | 0.142163 | 0.416418 | 0.404008 |
| C20                              | 0.055629 | 0.459404 | 0.404103 |
| C21                              | 0.724219 | 0.699685 | 0.403538 |
| C22                              | 0.391584 | 0.366581 | 0.403766 |
| C23                              | 0.441512 | 0.416355 | 0.403947 |
| C24                              | 0.485013 | 0.459367 | 0.404051 |
| C25                              | 0.846299 | 0.460846 | 0.901437 |
| C26                              | 0.512379 | 0.127665 | 0.90166  |
| C27                              | 0.946063 | 0.411104 | 0.901309 |
| C28                              | 0.032573 | 0.368222 | 0.901452 |
| C29                              | 0.696591 | 0.460938 | 0.901478 |
| C30                              | 0.364001 | 0.12774  | 0.90164  |
| C31                              | 0.646647 | 0.411178 | 0.901388 |
| C32                              | 0.603145 | 0.368149 | 0.901384 |

|     |          |          |          |
|-----|----------|----------|----------|
| C33 | 0.796032 | 0.411697 | 0.901319 |
| C34 | 0.46321  | 0.077626 | 0.901877 |
| C35 | 0.512883 | 0.977997 | 0.902247 |
| C36 | 0.55605  | 0.891476 | 0.902418 |
| C37 | 0.696748 | 0.610078 | 0.901968 |
| C38 | 0.363713 | 0.276674 | 0.901853 |
| C39 | 0.646833 | 0.709865 | 0.902195 |
| C40 | 0.603562 | 0.796419 | 0.90236  |
| C41 | 0.647254 | 0.560224 | 0.901766 |
| C42 | 0.313951 | 0.227147 | 0.901722 |
| C43 | 0.214267 | 0.277048 | 0.901512 |
| C44 | 0.127657 | 0.320722 | 0.901476 |
| C45 | 0.796141 | 0.56016  | 0.901735 |
| C46 | 0.462994 | 0.227057 | 0.901727 |
| C47 | 0.512734 | 0.27698  | 0.901523 |
| C48 | 0.555635 | 0.320608 | 0.901398 |
| H1  | 0.517645 | 0.229155 | 0.403665 |
| H2  | 0.76284  | 0.474038 | 0.403699 |
| H3  | 0.253766 | 0.492625 | 0.404167 |
| H4  | 0.499013 | 0.738261 | 0.404016 |
| H5  | 0.25345  | 0.229141 | 0.403763 |
| H6  | 0.762319 | 0.738344 | 0.403964 |
| H7  | 0.589149 | 0.089228 | 0.901273 |
| H8  | 0.834345 | 0.33491  | 0.901136 |
| H9  | 0.325311 | 0.35347  | 0.901571 |
| H10 | 0.570488 | 0.598374 | 0.901568 |
| H11 | 0.32577  | 0.089228 | 0.901292 |
| H12 | 0.834649 | 0.598418 | 0.901502 |
